# Supplementary material for: Structure-induced selective adsorption of diverse dyes and Cr(vi) photoreduction using two new polyoxometalate-based metal–viologen complexes
Source: Royal Society of Chemistry journal article supplement (doi:10.1039/d3ce01227a), 2024-01-01
Supplement: d3ce01227a1.pdf [file d3ce01227a1.pdf]

# **Structure-induced diverse selective dyes adsorption and Cr(VI) photoreduction for two new polyoxometalate-based metal-viologen complexes**

Xiuli Wang,<sup>\*‡</sup> Lin Yang,<sup>‡</sup> Zhong Zhang

<sup>‡</sup>Xiuli Wang and Lin Yang contributed equally to this work and should be considered as co-first authors

College of Chemistry and Materials Engineering, Bohai University, Professional Technology Innovation Center of Liaoning Province for Conversion Materials of Solar Cell, Jinzhou 121013, P. R. China.

Corresponding Authors: Email: wangxiuli@bhu.edu.cn

## Calculation of Capacity

Equation 1 was used to calculate the removal percentage of the dye.

$$R\% = \left[ \frac{A_0 - A_t}{A_t} \right] \times 100 \quad (1)$$

$A_0$  is the absorbance of the dye solution before the adsorption process; and  $A_t$  is the absorbance of the dye solution after the adsorption process.

**Table S1** Crystallographic data for **BHU-3** and **BHU-4**

| Complex                    | BHU-3                              | BHU-4                             |
|----------------------------|------------------------------------|-----------------------------------|
| Formula                    | $C_{72}H_{75}CuN_8O_{95}P_2W_{24}$ | $C_{54}H_{55}Co_3N_6O_{57}W_{12}$ |
| Formula weight             | 7110.28                            | 4083.03                           |
| crystal system             | Triclinic                          | Orthorhombic                      |
| space group                | $P_{-1}$                           | $Pna2_1$                          |
| $a/\text{\AA}$             | 13.0872(6)                         | 14.5892(9)                        |
| $b/\text{\AA}$             | 13.6972(7)                         | 21.9646(15)                       |
| $c/\text{\AA}$             | 19.4602(9)                         | 26.1741(17)                       |
| $\alpha/^\circ$            | 95.4120(10)                        | 90                                |
| $\beta/^\circ$             | 106.1440(10)                       | 90                                |
| $\gamma/^\circ$            | 93.0910(10)                        | 90                                |
| $V(\text{\AA}^3)$          | 3324.2(3)                          | 8387.4(9)                         |
| $Z$                        | 1                                  | 2                                 |
| $D_c(\text{g cm}^{-3})$    | 3.515                              | 3.161                             |
| $\mu(\text{mm}^{-1})$      | 20.949                             | 17.058                            |
| $F(000)$                   | 3117.0                             | 7180.0                            |
| Reflection collected       | 24689                              | 46919                             |
| Data/restraints/parameters | 16325/23/900                       | 14377/1517/1109                   |

|                                                                                                           |                                    |                                    |
|-----------------------------------------------------------------------------------------------------------|------------------------------------|------------------------------------|
| Goodness-of-fit on $F^2$                                                                                  | 1.016                              | 1.014                              |
| $R [I \geq 2\sigma(I)]$                                                                                   | $R_I = 0.0454,$<br>$wR_2 = 0.1089$ | $R_I = 0.0616,$<br>$wR_2 = 0.1242$ |
| $R$ [all data]                                                                                            | $R_I = 0.0781,$<br>$wR_2 = 0.1224$ | $R_I = 0.1123,$<br>$wR_2 = 0.1468$ |
| $R_I = \Sigma  F_o  -  F_c   / \Sigma F_o , wR_2 = \Sigma[w(F_o^2 - F_c^2)^2] / \Sigma[w(F_o^2)^2]^{1/2}$ |                                    |                                    |

**Table S2** Partial bond distances (Å) and angles (°) for **BHU-3** and **BHU-4**

| <b>BHU-3</b>                   |           |                     |           |
|--------------------------------|-----------|---------------------|-----------|
| Cu(1)–N(1)                     | 2.003(11) | N(1)#1–Cu(1)–N(3)   | 90.6(5)   |
| Cu(1)–N(3)                     | 2.020(12) | N(1)#–Cu(1)–N(3)#1  | 89.4(5)   |
| N(3)#1–Cu(1)–N(3)              | 180.0(4)  | N(1)–Cu(1)–N(3)#1   | 90.6(5)   |
| N(1)–Cu(1)–N(3)                | 89.4(5)   | N(1)#1–Cu(1)–N(1)   | 180.0     |
| Symmetry code: #1 2-x, 1-y, -z |           |                     |           |
| <b>BHU-4</b>                   |           |                     |           |
| Co(1)–O(1)                     | 2.13(3)   | N(1)–Co(1)–O(2W)    | 89.2(12)  |
| Co(1)–O(2)                     | 2.14(3)   | N(3)–Co(1)–O(1)     | 98.2(13)  |
| Co(1)–N(1)                     | 2.10(2)   | N(3)–Co(1)–O(2)     | 159.7(13) |
| Co(1)–N(3)                     | 2.05(4)   | N(3)–Co(1)–N(1)     | 104.7(12) |
| Co(1)–O(1W)                    | 2.17(3)   | N(3)–Co(1)–O(1W)    | 94.5(13)  |
| Co(1)–O(2W)                    | 2.17(3)   | N(3)–Co(1)–O(2W)    | 84.3(14)  |
| Co(2)–O(7)                     | 2.10(3)   | O(30)#1–Co(2)–O(7)  | 173.4(11) |
| Co(2)–O(30)#1                  | 2.04(3)   | O(30)#1–Co(2)–O(4W) | 87.5(14)  |
| Co(2)–N(5)                     | 2.120(18) | O(30)#1–Co(2)–O(5W) | 92.6(12)  |
| Co(2)–O(3W)                    | 2.04(3)   | O(30)#1–Co(2)–N(5)  | 93.3(11)  |
| Co(2)–O(4W)                    | 2.12(3)   | O(7)–Co(2)–O(4W)    | 85.9(13)  |
| Co(2)–O(5W)                    | 2.11(3)   | O(7)–Co(2)–O(5W)    | 87.2(12)  |
| O(2)–Co(1)–O(1W)               | 90.3(12)  | O(7)–Co(2)–N(5)     | 93.3(11)  |
| O(2)–Co(1)–O(2W)               | 90.4(12)  | O(4W)–Co(2)–N(5)    | 179.1(14) |
| O(1W)–Co(1)–O(2W)              | 178.5(12) | O(5W)–Co(2)–O(4W)   | 91.8(14)  |

|                  |           |                     |           |
|------------------|-----------|---------------------|-----------|
| O(1)–Co(1)–O(2)  | 62.1(11)  | O(5W)–Co(2)–N(5)    | 88.6(12)  |
| O(1)–Co(1)–O(1W) | 89.9(11)  | O(3W)–Co(2)–O(30)#1 | 85.8(13)  |
| O(1)–Co(1)–O(2W) | 89.3(11)  | O(3W)–Co(2)–O(7)    | 94.3(14)  |
| N(1)–Co(1)–O(2)  | 94.8(11)  | O(3W)–Co(2)–O(4W)   | 87.0(15)  |
| N(1)–Co(1)–O(1W) | 92.0(11)  | O(3W)–Co(2)–O(5W)   | 178.0(14) |
| N(1)–Co(1)–O(1)  | 156.8(11) | O(3W)–Co(2)–N(5)    | 92.6(13)  |

#1  $-x, 1-y, -1/2+z$

**Table S3** BVS calculations of Cu and Co atoms in **BHU-3** and **BHU-4**

| <b>BHU-3</b> |      | <b>BHU-4</b> |      |
|--------------|------|--------------|------|
| Cu1          | 1.41 | Co1          | 1.77 |
|              |      | Co2          | 1.99 |
|              |      | Co3          | 2.50 |

**Table S4** Selected hydrogen-bonding distance (Å) for **BHU-3** and **BHU-4**

| <b>BHU-3</b>       |      |       |           |         |                        |
|--------------------|------|-------|-----------|---------|------------------------|
| D–H···A            | D–H  | H···A | D···A     | D–H···A | symmetry code          |
| O1W–<br>H1WA···O16 | 0.85 | 2.18  | 3.02(3)   | 171     | $x, 1+y, z$            |
| O2–H2···O1         | 0.82 | 2.04  | 2.854(19) | 176     | $2-x, 3-y, 1-z$        |
| O1W–H1WB···O1      | 0.85 | 2.22  | 3.07(3)   | 172     | $1-x, 2-y, 1-z$        |
| O2W–<br>H2WB···O48 | 0.85 | 2.09  | 2.930(15) | 169     | $1-x, 1-y, 1-z$        |
| <b>BHU-4</b>       |      |       |           |         |                        |
| D–H···A            | D–H  | H···A | D···A     | D–H···A | symmetry code          |
| O6W–H6WA···O5      | 0.85 | 1.98  | 2.61(5)   | 130     | $1/2-x, 1/2+y, -1/2+z$ |
| O6W–<br>H6WB···O42 | 0.85 | 2.11  | 2.93(4)   | 164     | $1/2+x, 1/2-y, z$      |

**Table S5** Comparison of the adsorption rates of various adsorbents for MB

| Compound                                                                                                                                                                         | Time    | Adsorption rate | Ref |
|----------------------------------------------------------------------------------------------------------------------------------------------------------------------------------|---------|-----------------|-----|
| [Co(HL)(H <sub>2</sub> O) <sub>2</sub> (CrMo <sub>6</sub> (OH) <sub>6</sub> O <sub>18</sub> )] · 5H <sub>2</sub> O                                                               | 150 min | 96.09%          | [1] |
| H <sub>2</sub> [Cu <sub>2</sub> OL <sub>3</sub> (H <sub>2</sub> O) <sub>2</sub> ][Ce(L)(H <sub>2</sub> O) <sub>3</sub> (PW <sub>11</sub> O <sub>39</sub> )] · 17H <sub>2</sub> O | 240 min | 91.7%           | [2] |

|                                                                                                                                                                                                                                         |         |        |           |
|-----------------------------------------------------------------------------------------------------------------------------------------------------------------------------------------------------------------------------------------|---------|--------|-----------|
| O                                                                                                                                                                                                                                       |         |        |           |
| (TBA) <sub>3</sub> POM-1                                                                                                                                                                                                                | 240 min | 97.62% | [3]       |
| (Bpyen) <sub>2</sub> (Mo <sub>8</sub> O <sub>26</sub> )·2H <sub>2</sub> O                                                                                                                                                               | 150 min | 87.3%  | [4]       |
| {[Cu·L2'·(4,4'-bpy)]·[Cu·L2'·(β-Mo <sub>8</sub> O <sub>26</sub> )]·4H <sub>2</sub> O} <sub>n</sub>                                                                                                                                      | 285 min | 54.1%  | [5]       |
| {([Cu <sup>II</sup> (2,2-bpy) <sub>2</sub> ][PMo <sup>VI</sup> <sub>8</sub> V <sup>V</sup> <sub>2</sub> V <sup>IV</sup> <sub>2</sub> O <sub>40</sub> (V <sup>IV</sup> O) <sub>2</sub> ])[Cu <sup>I</sup> (2,2'-bpy)]}·2H <sub>2</sub> O | 120 min | 92.1%  | [6]       |
| <b>BHU-3</b>                                                                                                                                                                                                                            | 120 min | 97%    | This work |
| <b>BHU-4</b>                                                                                                                                                                                                                            | 1 min   | 97%    |           |

**Table S6** The reduction rate of **BHU-3** and **BHU-4** compared with other works

| Compound                                                                                                                                                                                                                                                                    | Time    | Reduction rate | Ref  |     |
|-----------------------------------------------------------------------------------------------------------------------------------------------------------------------------------------------------------------------------------------------------------------------------|---------|----------------|------|-----|
| {Cu <sub>2</sub> (OH)(Ptep) <sub>2</sub> [H(β-Mo <sub>8</sub> O <sub>26</sub> )]}·2H <sub>2</sub> O                                                                                                                                                                         | 40 min  | 52.9%          | [7]  |     |
| [Cu(bimeb)(H <sub>2</sub> O) <sub>2</sub> ][(β-Mo <sub>8</sub> O <sub>26</sub> ) <sub>0.5</sub> ]                                                                                                                                                                           | 40 min  | 54.4%          |      |     |
| (H <sub>2</sub> L <sub>1</sub> ) <sub>2</sub> (H <sub>2</sub> L <sub>2</sub> ) <sub>2</sub> [Na(H <sub>2</sub> O)] <sub>2</sub> [Fe(H <sub>2</sub> O) <sub>2</sub> ]<br>{M[P <sub>4</sub> Mo <sub>6</sub> O <sub>31</sub> H <sub>5</sub> ] <sub>2</sub> }·7H <sub>2</sub> O | 120 min | 86%            | [8]  |     |
| (H <sub>2</sub> L <sub>1</sub> ) <sub>2</sub> (H <sub>2</sub> L <sub>2</sub> ) <sub>2</sub> [Na(H <sub>2</sub> O)] <sub>2</sub> [Co(H <sub>2</sub> O) <sub>2</sub> ]<br>{M[P <sub>4</sub> Mo <sub>6</sub> O <sub>31</sub> H <sub>5</sub> ] <sub>2</sub> }·7H <sub>2</sub> O | 120 min | 82%            |      |     |
| (H <sub>2</sub> L <sub>1</sub> ) <sub>2</sub> (H <sub>2</sub> L <sub>2</sub> ) <sub>2</sub> [Na(H <sub>2</sub> O)] <sub>2</sub> [Mn(H <sub>2</sub> O) <sub>2</sub> ]<br>{M[P <sub>4</sub> Mo <sub>6</sub> O <sub>31</sub> H <sub>5</sub> ] <sub>2</sub> }·7H <sub>2</sub> O | 120 min | 76%            |      |     |
| (H <sub>2</sub> L <sub>1</sub> ) <sub>2</sub> (H <sub>2</sub> L <sub>2</sub> ) <sub>2</sub> [Na(H <sub>2</sub> O)] <sub>2</sub> [Zn(H <sub>2</sub> O) <sub>2</sub> ]<br>{M[P <sub>4</sub> Mo <sub>6</sub> O <sub>31</sub> H <sub>5</sub> ] <sub>2</sub> }·7H <sub>2</sub> O | 120 min | 72%            |      |     |
| [Cu <sub>2</sub> (Cmt) <sub>2</sub> (OH)Cl(β-Mo <sub>8</sub> O <sub>26</sub> ) <sub>0.5</sub> ]                                                                                                                                                                             | 60 min  | 54.3%          |      | [9] |
| [Cu(H <sub>2</sub> O) <sub>3</sub> (H <sub>3/2</sub> Tpm) <sub>2</sub> ](HTpm)(PMo <sub>12</sub> O <sub>40</sub> ) <sub>2</sub> ·4H <sub>2</sub> O                                                                                                                          | 60 min  | 69.5%          |      |     |
| [Cu <sub>3</sub> Cl <sub>2</sub> (H <sub>2</sub> Tpm) <sub>2</sub> (HTpm) <sub>4</sub> (PMo <sub>12</sub> O <sub>40</sub> ) <sub>4</sub> ] <sub>2</sub> ·6H <sub>2</sub> O                                                                                                  | 60 min  | 56.9%          |      |     |
| [Co <sub>3</sub> (HTpm) <sub>6</sub> (H <sub>2</sub> O) <sub>2</sub> (Mo <sub>13</sub> O <sub>42</sub> ) <sub>2</sub> ] <sub>2</sub> ·21H <sub>2</sub> O                                                                                                                    | 60 min  | 66.4%          |      |     |
| {Ni <sub>2</sub> (DEP) <sub>2</sub> (H <sub>2</sub> O) <sub>6</sub> [H <sub>2</sub> (TeMo <sub>6</sub> O <sub>24</sub> )]}                                                                                                                                                  | 60 min  | 52.3%          | [10] |     |
| {Zn <sub>2</sub> (DEP) <sub>2</sub> (H <sub>2</sub> O) <sub>6</sub> [H <sub>2</sub> (TeMo <sub>6</sub> O <sub>24</sub> )]}                                                                                                                                                  | 60 min  | 53.2%          |      |     |
| {Co(DEP) <sub>2</sub> (H <sub>2</sub> O) <sub>2</sub> [H <sub>2</sub> (γ-Mo <sub>8</sub> O <sub>26</sub> )]}·11H <sub>2</sub> O                                                                                                                                             | 60 min  | 54.8%          |      |     |
| {Cu(DEP)[(H <sub>2</sub> β-Mo <sub>8</sub> O <sub>26</sub> ) <sub>0.5</sub> ]}                                                                                                                                                                                              | 60 min  | 60.6%          |      |     |
| [Cu <sub>6</sub> (DTP) <sub>5</sub> (OH) <sub>2</sub> (H <sub>2</sub> O) <sub>6</sub> (PW <sup>VI</sup> <sub>10</sub> W <sup>V</sup> <sub>2</sub> O <sub>40</sub> ) <sub>2</sub> ]                                                                                          | 60 min  | 51.7%          |      |     |
| (H <sub>2</sub> DBQ)[Fe(H <sub>2</sub> O) <sub>3</sub> ] <sub>2</sub> {Fe[P <sub>4</sub> Mo <sub>6</sub> O <sub>31</sub> H <sub>7</sub> ] <sub>2</sub> }·7H <sub>2</sub> O                                                                                                  | 120 min | 91%            | [11] |     |
| (H <sub>2</sub> DBQ) <sub>2</sub> (H <sub>2</sub> DBP)[Fe(H <sub>2</sub> O) <sub>4</sub> ]{Fe[P <sub>4</sub> Mo <sub>6</sub> ]                                                                                                                                              | 120 min | 86%            |      |     |

|                                                                                                                          |         |        |           |
|--------------------------------------------------------------------------------------------------------------------------|---------|--------|-----------|
| $O_{31}H_7]_2 \cdot 4H_2O$                                                                                               |         |        |           |
| $(H_2DBP)_2\{Fe[P_4Mo_6O_{31}H_9]_2\} \cdot 10H_2O$                                                                      | 120 min | 81%    |           |
| $(FPDS)_3[PW_{12}O_{40}]$                                                                                                | 120 min | 50%    | [12]      |
| $(FPDS)_4[SiMo_{12}O_{40}]$                                                                                              | 120 min | 33%    |           |
| $(FPDS)_4[SiW_{12}O_{40}]$                                                                                               | 120 min | 30%    |           |
| $(H_2bpe)_3[Zn(H_2PO_4)][Zn(bpe)(H_2O)_2]H\{Zn[P_4Mo_6O_{31}H_6]_2\} \cdot 6H_2O$                                        | 20 min  | 79%    | [13]      |
| $Na_6[H_2bz]_2[ZnNa_4(H_2O)_5]\{Zn[P_4Mo_6O_{31}H_3]_2\} \cdot 2H_2O$                                                    | 20 min  | 70%    |           |
| $(H_2mbpy)\{[Zn(mbpy)(H_2O)]_2[Zn(H_2O)]_2\}\{Zn[P_4Mo_6O_{31}H_6]_2\} \cdot 10H_2O$                                     | 20 min  | 64%    |           |
| $(H_2bpp)_2[\{Na_4(H_2O)_5\}\{Co_{0.8}Cd_{0.2}(H_2O)_2\}\{Cd[Mo_6O_{12}(OH)_3(H_2PO_4)(HPO_4)(PO_4)_2]_2\}] \cdot 2H_2O$ | 180 min | 74%    | [14]      |
| $(H_2bpp)_3[Zn_2\{Cd[Mo_6O_{12}(OH)_3(HPO_4)_3(PO_4)_2]_2\}] \cdot 6H_2O$                                                | 180 min | 68%    |           |
| $[(H_2bpp)_3(bpp)_2][\{Al_2(H_2O)_4\}\{Cd[Mo_6O_{12}(OH)_3(H_2PO_4)_2(HPO_4)(PO_4)_2]_2\}] \cdot 9H_2O$                  | 180 min | 55%    |           |
| <b>BHU-3</b>                                                                                                             | 90 min  | 91.94% | This work |
| <b>BHU-4</b>                                                                                                             | 90 min  | 63.09% |           |

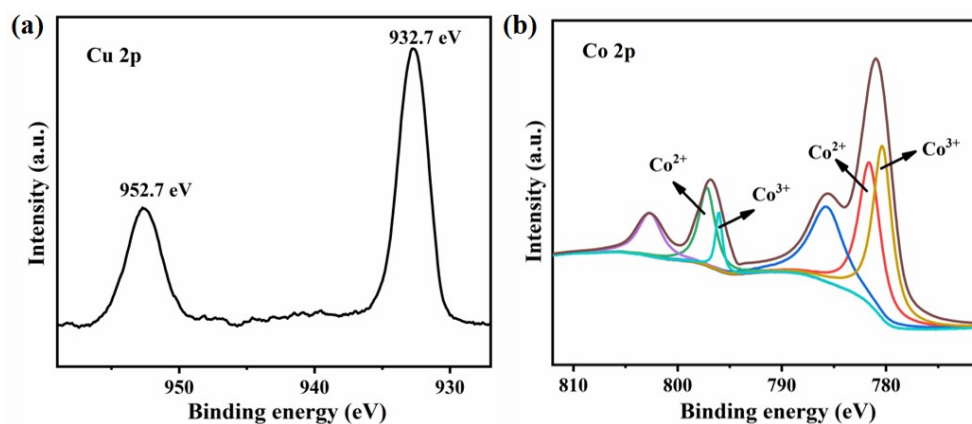

**Fig. S1** The XPS spectra of Cu in **BHU-3** (a) and Co in **BHU-4** (b).

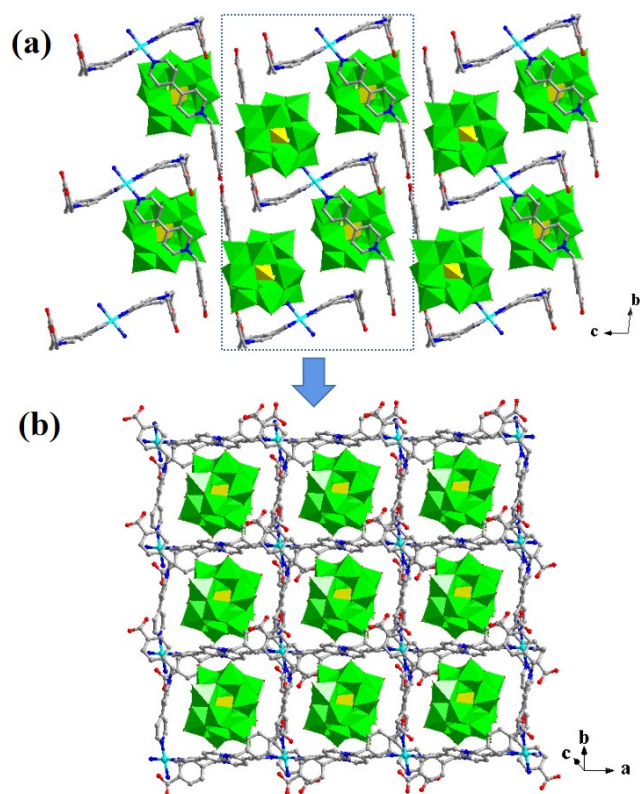

Fig. S2 The 3-D stacking of BHU-3.

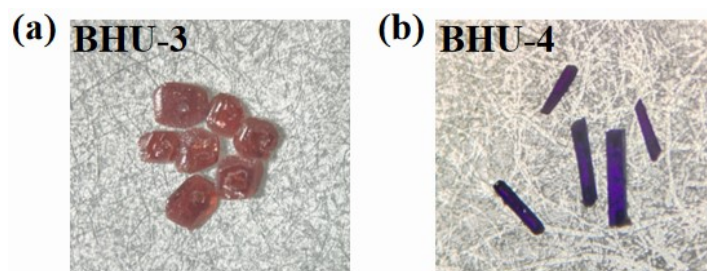

Fig. S3 The pictures of BHU-3 and BHU-4 under optical microscope.

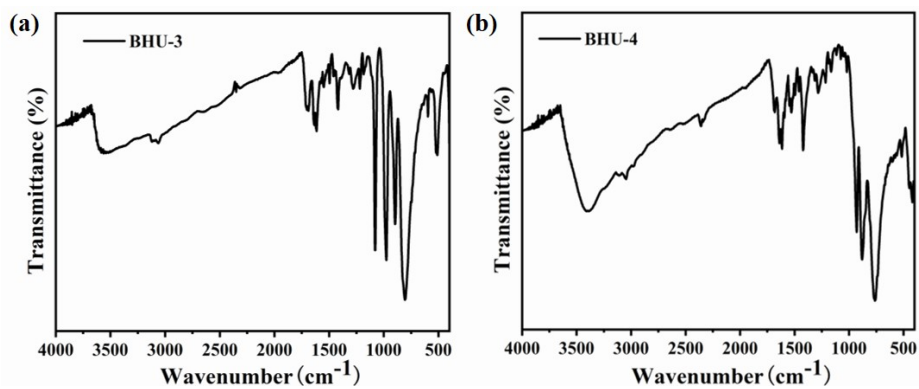

Fig. S4 The IR spectra of BHU-3 and BHU-4.

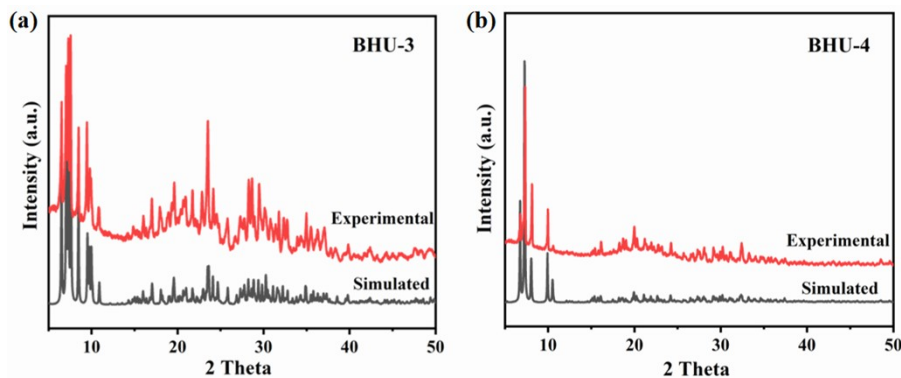

**Fig. S5** The PXRD patterns of **BHU-3** and **BHU-4**.

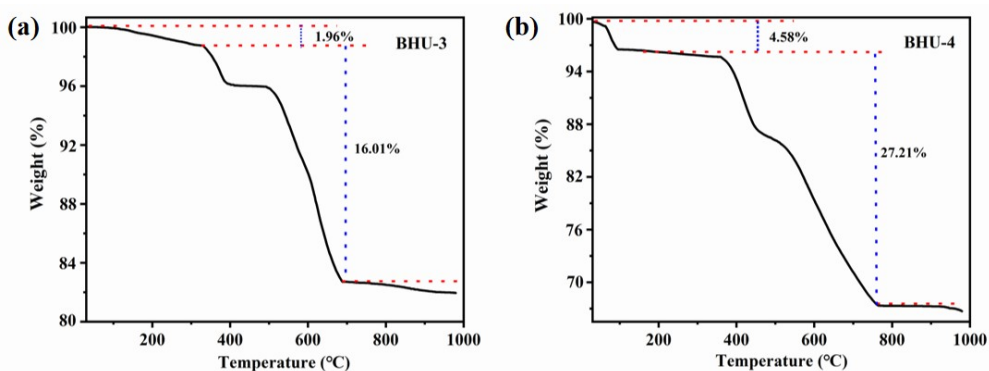

**Fig. S6** The TGA curves of **BHU-3** and **BHU-4**.

The TGA curve of **BHU-3** shows that the crystal structure can be maintained before 321 °C, and the continuous weight loss between 30 and 321 °C is attributed to the removal of lattice waters (cal. 1.77% vs. observed 1.96%) (Fig. S5a). The TGA curve of **BHU-4** is similar to that of **BHU-3**, the crystal structure remains stable before 399 °C, and the continuous weight loss between 30 and 399 °C is attributed to the removal of lattice waters and coordination waters (cal. 4.93% vs observed 4.58%).



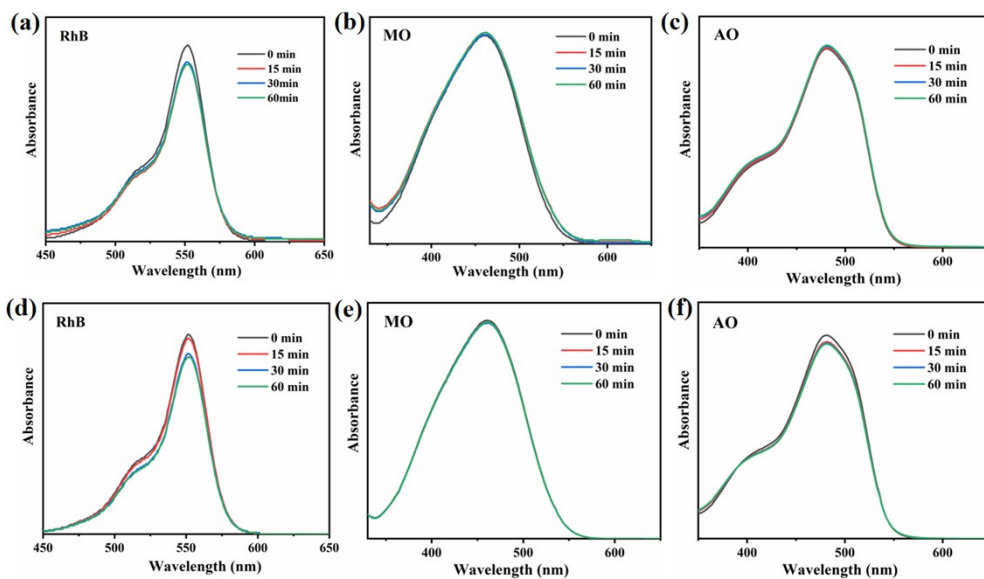

**Fig. S7** The adsorption of (a-c) **BHU-3** and (d-f) **BHU-4** toward RhB, MO and AO.

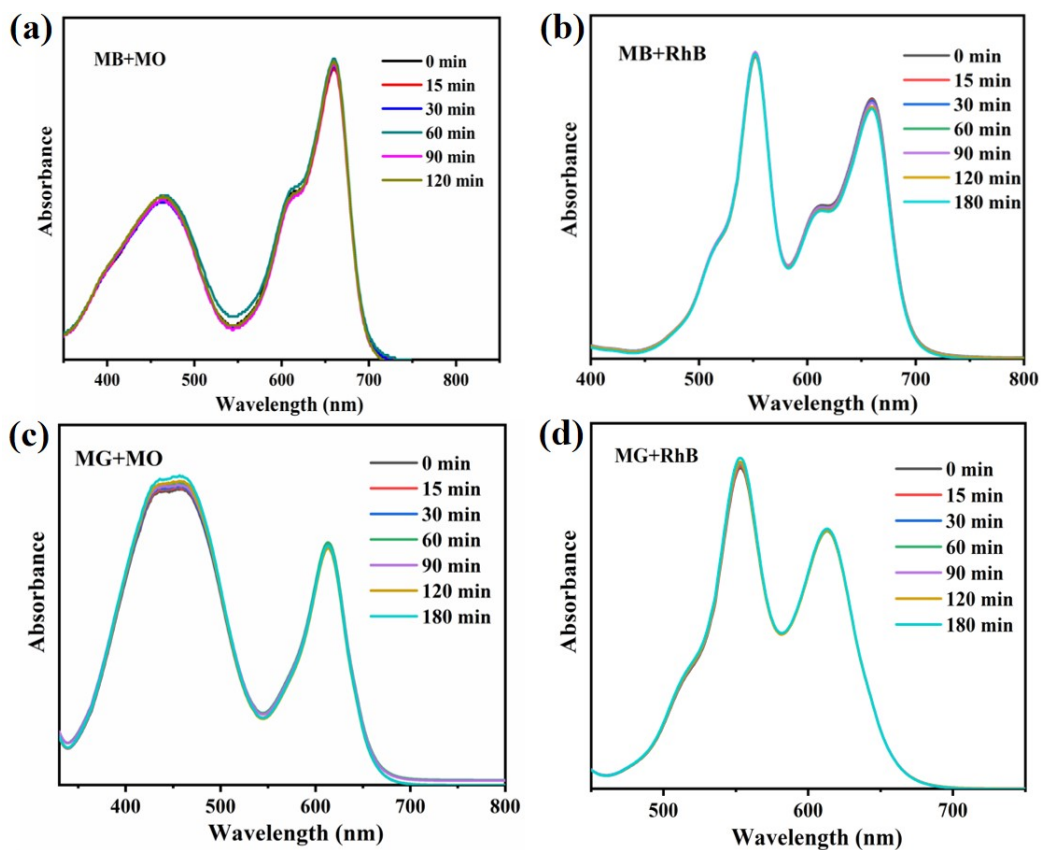

**Fig. S8** The UV-vis spectra of the mixed dye solutions without catalyst.

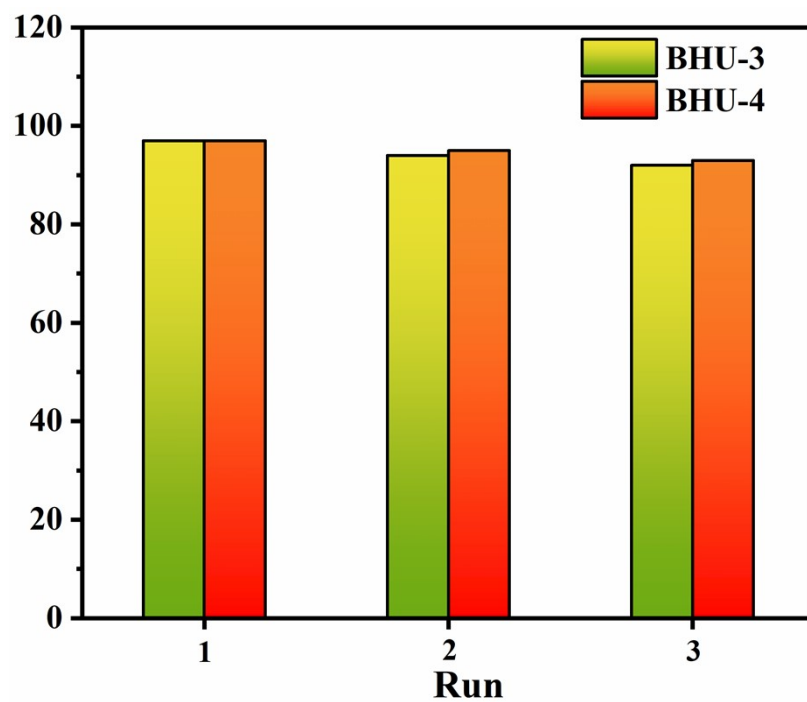

**Fig. S9** The adsorption rates of **BHU-3** and **BHU-4** toward MB with 3 cycles.

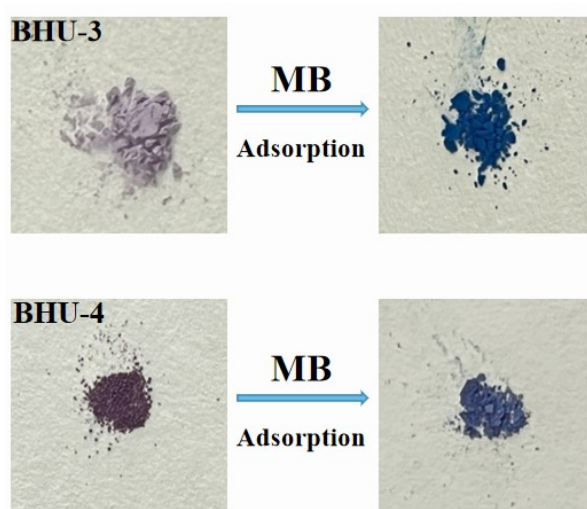

**Fig. S10** The photographs of **BHU-3** and **BHU-4** before and after MB adsorption.

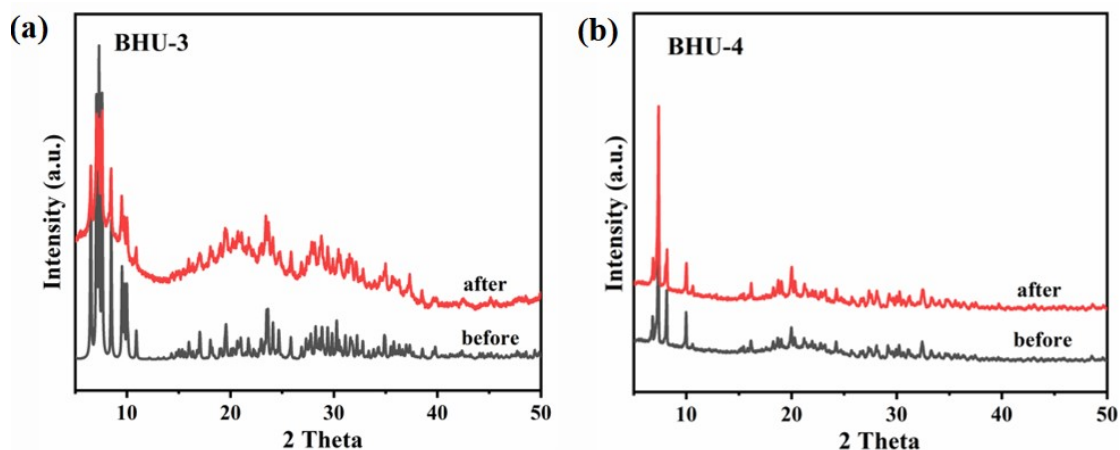

Fig. S11 The PXRD patterns of **BHU-3** and **BHU-4** toward MB adsorption before and after 3 cycles.

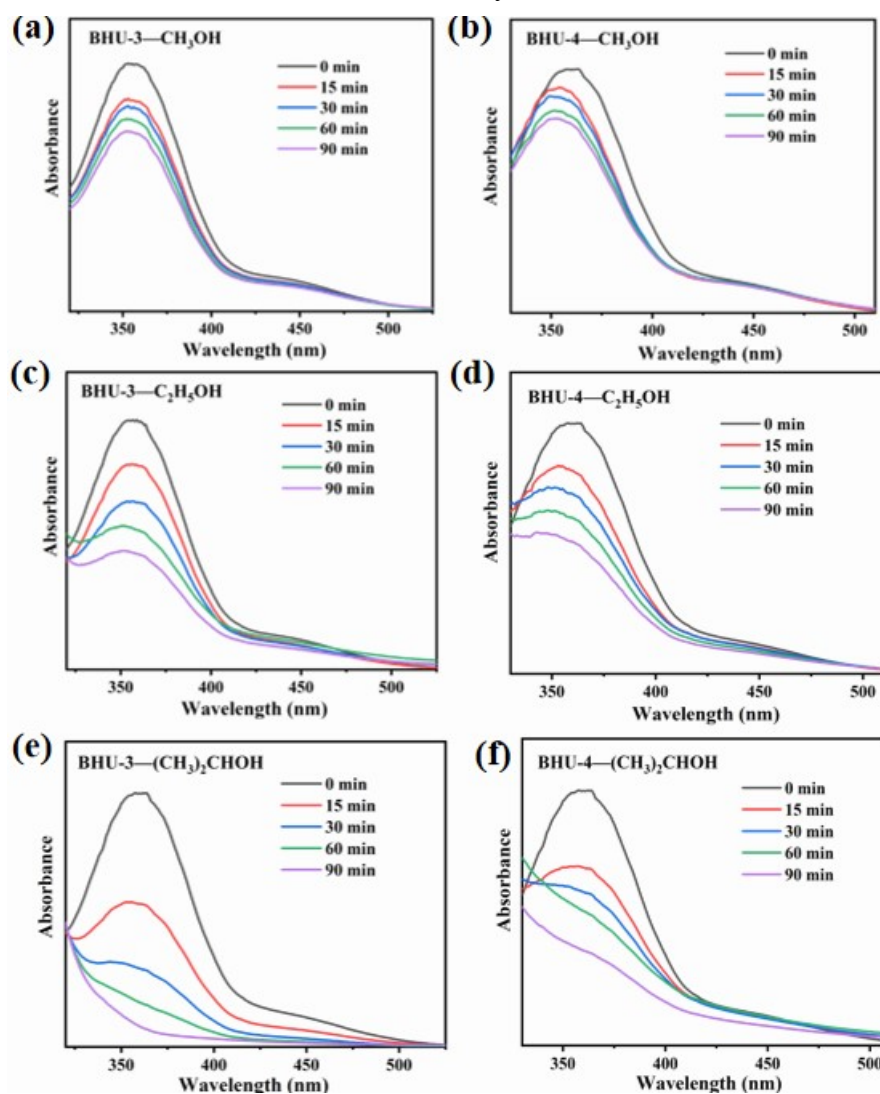

Fig. S12 Photocatalytic reduction of Cr(VI) with **BHU-3** or **BHU-4** in (a-b) methanol; (c-d) ethanol; (e-f) isopropanol.

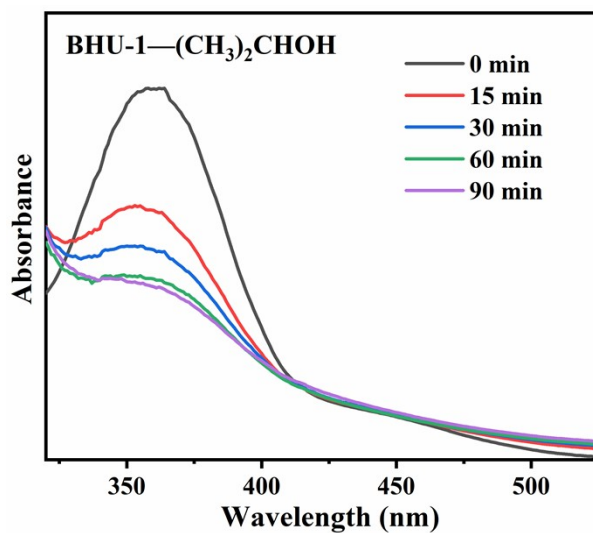

**Fig. S13** Photocatalytic reduction of Cr(VI) with **BHU-1** in isopropanol.

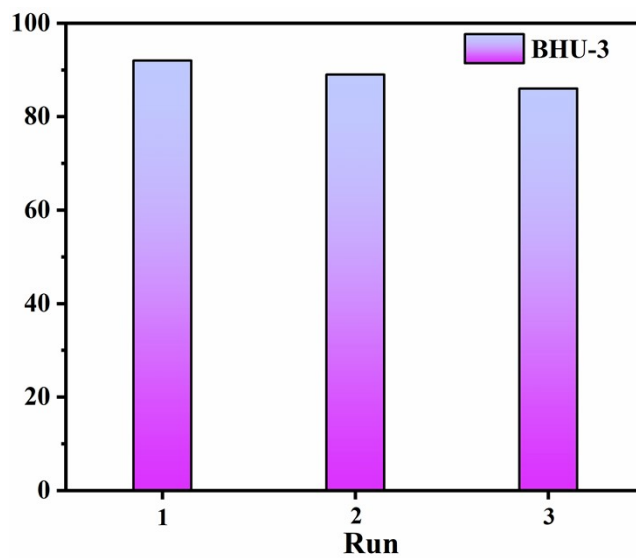

**Fig. S14** The Cr(VI) photoreduction rates of **BHU-3** before and after 3 cycles.

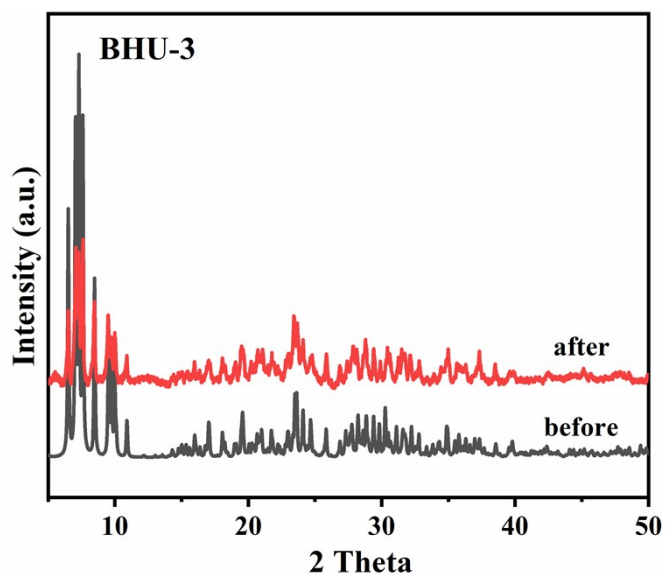

**Fig. S15** The PXRD spectra of **BHU-3** toward Cr(VI) photoreduction before and after 3 cycles.

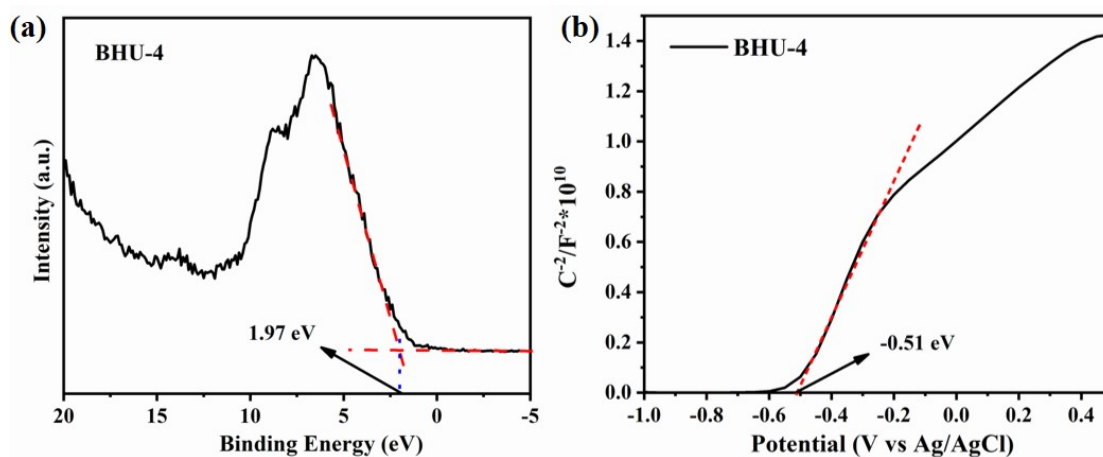

**Fig. S16** The VB-XPS and MS of **BHU-4**.

## References

- [1] Y. Zhang, X. Wang, Y. Wang, L. Li, N. Xu and X. L. Wang, *Inorg. Chem. Front.*, 2021, **8**, 4458-4466.
- [2] R. T. Zhang, H. P. Xiao, Z. Li, M. Wang, Y. F. Xie, Y. D. Ye, X. X. Li and S. T. Zheng, *CrystEngComm*, 2021, **23**, 2973-2981.
- [3] L. Qin, Y. Pan, F.Q. Xie, L. Yu, R. R. Huai, L. Yang, D. P. Zhang, Z. Zhou, *Inorg. Chem. Commun.*, 2021, **133**, 108988.
- [4] J. H. Li, X. L. Wang, G. Song, H. Y. Lin, X. Wang and G. C. Liu, *Dalton Trans.*, 2020, **49**,

1265-1275.

[5] Y. Y. Li, Y. Q. Lu, X. Y. Qiao, W. M. Huang, Y. Y. Niu, *Inorg. Chem. Commun.*, 2020, **118**, 108002.

[6] Y. B. Liu, W. T. Zhao, J. J. Zheng, H. Wang, X. B. Cui and Y. D. Chi, *Molecules*, 2023, **28**, 4706.

[7] J. Ying, C. X. Sun, L. Jin, A. X. Tian and X. L. Wang, *CrystEngComm*, 2021, **23**, 5385-5396.

[8] H. X. Bi, X. Y. Yin, X. J. Zhang, Y. Y. Ma and Z. G. Han, *CrystEngComm*, 2022, **24**, 1002-1009.

[9] S. F. Ma, J. Ying, Y. P. Zhang, A. X. Tian, *CrystEngComm*, 2022, **24**, 2891-2902.

[10] X. Xu, Y. P. Zhang, J. Ying, L. Jin, A. X. Tian, X. L. Wang, *CrystEngComm*, 2022, **24**, 1267-1278.

[11] H. X. Bi, X. Y. Yin, J. Y. He, H. Song, S. J. Lu, Y. Y. Ma, Z. G. Han, *Rare Met.*, 2023, **42**, 3638-3650.

[12] M. Singh, A. Yadav, C. P. Pradeep, *Langmuir* 2022, **38**, 16034-16045.

[13] Y. Q. Zhang, L. Hou, H. X. Bi, X. X. Fang, Y. Y. Ma, Z. G. Han, *chemistry-an Asian journal*, 2021, **16**, 1584-1591.

[14] X. R. Tian, Y. Q. Zhang, Y. Y. Ma, Q. Zhao, Z. G. Han, *Catal. Sci. Technol.*, 2020, **10**, 2593-2601.
